# Supplementary material for: An expedient synthesis of substituted tetraaryltetrabenzoporphyrins
Source: Royal Society of Chemistry journal article supplement (doi:10.1039/b008816l), 2001-01-01
Supplement: b008816l.doc [file b008816l.doc]

**An expedient synthesis of substituted tetraaryltetrabenzoporphyrins**

Olga Finikova, Andrei Cheprakov, Irina Beletskaya and Sergei Vinogradov

**Supporting Information**

1H and 13C NMR spectra were recorded on Varian Anova-500 (500 MHz) and on Varian Unity-400 (400 MHz) spectrometers. Matrix-assisted laser desorption mass spectroscopy (MALDI-MS) was performed on a Micromass (Beverly, MA; formerly Fisons Instruments, Inc.) TofSpec time-of-flight mass spectrometer (0.6 m flight tube) outfitted with a N2 (337 nm, 4 ns pulse) laser. The accelerating voltage was set to 20 kV and the detector voltage to 1.5 kV. Positive ion data were collected in the linear mode, each spectrum derived from the accumulation of 20 to 50 laser shots. External calibrations were performed using synthetic peptides having masses covering the range of interest. Data was analyzed using Micromass Opus Software. Samples were dissolved in CHCl3/methanol (60:40) and diluted before analysis using -cyano-4-hydroxycinnamic acid as the matrix.

UV-VIS absorption spectra and steady state phosphorescence spectra were recorded on Beckman DU-64 and on SPF-500C spectrofluorometer (SLM Instruments, Inc., USA) respectively. Electronic absorption spectra were recorded for diluted (~5 mol) solutions. Emission spectra were obtained using diluted solutions (absorption at excitation maximum <0.05 OD). Right angle detection was used for all measurements. Phosphorescence spectra were measured by comparing the emission of degassed and air saturated samples. Samples were degassed by either repetitive freeze-degas-thaw cycles (organic solutions) or by passing Ar (water solutions).

All solvents were purified according to the standard procedures. *Selecto* silica gel (Fisher) was used for column chromatography. All starting materials (sulfone, dimethyl maleate (DMM), aldehydes, etc.) were purchased from Aldrich, Inc. *Tert*-butyl isocyanoacetate was prepared according to the published procedure.[[1]](#footnote-2) Compound **2** was synthesized from commercially available sulfolene **1** in 86% yield according to the published method.[[2]](#footnote-3) *Cis*-isomer of **4** (**4**-*cis*) was synthesized from commercially available *cis*-tetrahydrophthalic anhydride in 81% yield according to the published procedure.Error: Reference source not found Alternatively, **4**-*cis* was synthesized from sulfolene **2** and DMM in 54% yield according to another published method.[[3]](#footnote-4) **4**-*trans* was synthesized from **3**-*trans* in 88% yield following the procedure published previously.Error: Reference source not found **3***-trans*was obtained in 85% yield from sulfolene **1** and DMM according to the published procedure.Error: Reference source not found

**Pyrrol-ester 5:** Ester **5** was synthesized following the method published previously.[[4]](#footnote-5) *Tert*-butyl isocyanoacetate (1.01 g, 7 mmol) was added to a suspension of tBuOK (85%, 0.9 g, 7 mmol) in 15 ml of freshly distilled THF at 0°C under Ar. A solution of 2.0 g (5.9 mmol) of sulfone **4** in 15 ml THF was added to the mixture in one portion, and the mixture was left to react at r.t. under continuous stirring. After 3-4 h the volume of the mixture was reduced to about 10 ml by rotary evaporation. 100 ml of CHCl3 was added to the mixture, and the resulting solution was washed with water, then with brine and then dried over Na2SO4. After evaporation of the solvent, the residue was re-crystallized from ether-hexane. Yield of **5**: from **4**-*cis*, 1.6 g, 80%, white crystals, m.p. 126-127°C; from **4**-*trans*, 1.9 g, 95%, white crystals, m.p. 173-175°C. 1H NMR (CDCl3, 400 MHz): **5**-*cis*:  9.0 (broad s, 1H), 6.6 (d, 1H), 3.65 (s, 6H), 2.7-3.3 (m, 6H), 1.55 (s, 9H); **5**-*trans*:  8.95 (broad s, 1H), 6.65 (d, 1H), 3.7 (s, 6H), 2.5-3.5 (m, 6H), 1.55 (s, 9H).

**Pyrrole 6:** Ester **5** (0.5 g) was dissolved in TFA (5 ml), and the solution was left for 30 min under Ar in the dark at r.t. CH2Cl2 (20 ml) was added, and the mixture was poured into cold water. Organic layer was collected, washed with water, with Na2CO3, with water again and dried over Na2SO4. The solvent was removed in vacuum and the remaining oil was chromatographed on silica gel (eluent CH2Cl2:THF = 20:1). Yield of **6**: 105 mg, 30%, colorless oil. Pyrrole **6** rapidly reddens when kept at r.t. It was used in the porphyrin synthesis immediately following the purification. 1H NMR (CDCl3, 400 MHz):  8.05 (broad s, 1H), 6.5 (d, 2H, *J* = 2.5 Hz), 3.65 (s, 6H), 2.88-3.27 (m, 6H).

**Porphyrins 7a-d:** Pyrrole **6** (0.105 g, 0.44 mmol) was dissolved in 40 ml of CH2Cl2 under Ar, followed by an addition of aromatic aldehyde (1 eq.) and stirring the mixture for 10 min in the dark at r.t. BF3·Et2O (0.2 eq, 0.01 ml) was added in one portion, the mixture was stirred for 2 hrs, after which DDQ (100 mg of) was added, and the mixture was left overnight under continuous stirring. The resulting solution was washed with Na2SO3 until no more color was extracted into the aqueous phase. The mixture was further washed with water and dried over Na2SO4. Porphyrin **7(a-d)** was either purified on a silica gel column (eluent CHCl3) or used directly in the preparation of the metal complexes (see below). Yield: 25-35%, green powders. 1H NMR of **7a** (dmso-d6, 400 MHz):  8.05 (broad s, 8H), 7.8 (broad s, 12H), 3.4 (s, 24H), 2.4-3.4 (m, overlaps with solvent resonance); 1H NMR of **7a**-Zn complex:  7.6-8.2 (broad m, 20H), 3.55 (broad s, 24 H), 2.6-2.9 (unresolved m, overlaps with solvent resonance).

**Porphyrin 7a, alternative method**: Ester **5** (0.2 g, 0.84 mmol), PhCHO (1 eq, 0.063 g) and TosOH (ca. 10 mol %, 0.015 mg) were dissolved in 12 ml of AcOH, and the mixture was refluxed in the dark under Ar. After about 30 min, the air was let into the flask, and refluxing was continued for 8 hrs, during which the color of the mixture gradually changed from dark purple to dull green. The mixture was allowed to cool down and left overnight on a stirrer. The mixture was diluted with CHCl3 (100 ml), washed with water, then with Na2CO3, with water again and dried over Na2SO4. The solvent was evaporated to dryness, and the resulting dark material was chromatographed on silica gel (eluent CHCl3:THF = 20:1), giving 55-65 mg of the crude porphyrin **7a**. Porphyrin **7a** was converted into it's Zn complex (see below), which was purified by chromatography on silica gel (eluent CHCl3:THF = 20:1). Yield of **7a**-Zn complex: 30 mg, 11%, dark red solid.

**Tetrabenzoporphyrins 8a-d** [[5]](#footnote-6)**:** An excess of Zn acetate was added to a solution of porphyrin **7(a-c)** in the CHCl3:MeOH mixture (9:1). The mixture was stirred for 30 min at r.t., washed with water, dried over Na2SO4, and the solvents were evaporated in vacuum. The remaining solid was dissolved in dry THF (or MeCN), followed by an addition of an excess of DDQ and refluxing the mixture during 1-1.5 h. The conversion of porphyrins **7(a-c)** into TBP's **8(a-c)** was monitored using UV-Vis spectroscopy. The reaction was stopped when no more changes were observed in the Soret band region. The mixture was allowed to cool down, diluted with CH2Cl2, washed with water, then with Na2SO3 solution, then again with water and dried over Na2SO4. The solvent was removed in vacuum, and the remaining solid was chromatographed on silica gel (eluent CH2Cl2:THF = 20:1). The main green fraction (Rf  0.2) was collected. Tetrabenzoporphyrin **8(a-c)** was further purified by repetitative re-precipitation from CH2Cl2 with hexane, until mother liquors were colorless. The solid precipitate was dried in vacuum. Yield: 90-95%, green powders.

**8a** - Zn-complex - 1H NMR (dmso-d6, 400 MHz):  8.49 (d, 8H, J = 7.3 Hz), 8.33 (t, 4H, J = 7.6 Hz), 8.19 (t, 8H, J = 7.6 Hz), 7.63 (s, 8H), 4.01 (s, 24H); MALDI m/z: calcd 1341, found 1343; UV-Vis (max, nm, DMF): 488, 625, 671.

**8b** - Zn-complex - 1H NMR (CDCl3, 500 MHz): 8.04 (unresolved m, 16H), 7.08 (b singlet, 8H), 3.35 (b singlet, 24H); MALDI m/z: calcd 1655, found 1653; UV-Vis (max, nm, DMF): 483, 620, 668.

**8c** - Zn-complex - 1H NMR (CDCl3, 500 MHz): 8.13 (unresolved m, 16H), 7.01 (b singlet, 8H), 4.39 (broad s, 12H), 3.54 (broad s, 24 H); MALDI m/z: calcd 1461, found 1461; UV-Vis (max, nm, DMF): 489, 625, 669.

(Zn complexes of **8** very easily undergo demetalation. The signals in the spectra of **8b**-Zn and **8c**-Zn were significantly broadened due to the presence of the free-base porphyrins **9b, c**. Interestingly, the MALDI spectra of **8b, c**-Zn distinctly showed the corresponding molecular ions. Currently, we are looking for an optimal metal to be used in both the synthesis (aromatization step) and for the NMR characterization. Zn-complexes are very labile, while binding of Ni, Cu and Pd to the porphyrins is on the contrary so strong that these metals cannot be taken back, even under very acidic conditions).

**Tetrabenzoporphyrin 9a-c (free-bases):** TFA (1 ml) was added to a stirred solution of tetrabenzoporphyrin **8(a-c)** (~20 mg) in 15 ml of CH2Cl2, which resulted in an almost immediate change of color to red-brown. The mixture was allowed to react for 15 min, followed by addition of 50 ml of CH2Cl2. The solution was transferred into a separatory funnel and washed with water, then with NaOH (10% solution), then again with water and dried over Na2SO4. The chromatographic purification of the resulting solution (silica gel, CH2Cl2:THF = 12:1) afforded TBP **9(a-c)** in 95-97% yields. **9a** - MALDI m/z: calcd 1278, found 1279; UV-Vis (max, nm, DMF): 478, 602, 645, 710; **9b** - MALDI m/z: calcd 1592, found 1594; **9c** - MALDI m/z: calcd 1398, found 1399.

**Pd-tetraphenyl-octamethoxycarbonyl-tetrabenzoporphyrin (10a):** Tetrabenzoporphyrin **9a** (20 mg) was refluxed with an excess of PdCl2 (10 mg) in 10 ml of benzonitrile for 20-30 min until the Pd-insertion was complete. The completeness of conversion could be detected using absorption spectroscopy by monitoring changes in the Q-band region. However, a much more sensitive method is to use the fluorescence spectroscopy and to monitor the disappearance of the fluorescent band with max at 730 nm, which is due to the free-base-porphyrin **9a**. The excitation can be carried at either Soret band (max 446 nm) or at Q band (max 636 nm). After the reaction completion, the mixture was cooled down and benzonitrile was removed in vacuum. Pd-complex **10a** was purified by chromatography on silica gel (eluent CH2Cl2:THF=12:1). Yield: 23 mg, 95%, green solid. 1H NMR (dmso-d6, 500 MHz):  8.23 (d, 8H, J = 6.5 Hz), 8.07 (t, 4H, J = 8.0 Hz), 7.96 (t, 8H, J = 8.0 Hz), 7.38 (s, 8H), 3.76 (s, 24H); MALDI m/z: calcd 1341, found 1343; UV-Vis (max, nm, DMF): 456, 586, 636.

**Pd-tetraphenyl-octacarboxy-tetrabenzoporphyrin (11a)**: Pd-tetrabenzoporphyrin (20 mg) **10a** was rigorously stirred with solid NaOH (3 pellets) in 5 ml of THF. After about 1 h, 20 ml of water was added, and the mixture was refluxed for 2 hrs. THF was removed from the mixture on a rotary evaporator under low vacuum and the remaining aqueous solution was filtered. Pd-tetraphenyl-octacarboxy-tetrabenzoporphyrin (**11a**) was precipitated from the solution upon addition of an excess of HCl. The green precipitate was collected by centrifugation, repeatedly washed with water until the neutral reaction of supernatant and dried in vacuum. Yield: 19 mg, 99%, dark green powder. 1H NMR (dmso-d6, 500 MHz):  8.25 (d, 8H, J = 7.0 Hz), 8.01 (t, 4H, J = 7.0 Hz), 7.95 (t, 8H, J = 7.0 Hz), 7.38 (broad s, 8H); UV-Vis (max, nm, H2O): 446, 586, 636.

1. L. Ugi, *Chem. Ber.*, 1961, **94**, 2814. [↑](#footnote-ref-2)
2. P. B. Hopkins and P. L. Fuchs, *J. Org. Chem.,* 1978, **43**, 1208. [↑](#footnote-ref-3)
3. T.-S. Chou and S.-C. Hung, *J. Org. Chem.,* 1988, **53**, 3020. [↑](#footnote-ref-4)
4. Y. Abel, E. Haake, G. Haake, W. Schmidt, D. Struve, A. Walter, F.-P. Montforts, *Helv. Chim. Acta*, 1998, **81**, 1978. [↑](#footnote-ref-5)
5. Synthesis of tetrabenzoporphyrin **8d** was performed using Ni complex only. See endnote 17 in the main text. [↑](#footnote-ref-6)
